# Supplementary material for: Computational Biophysical, Biochemical, and Evolutionary Signature of Human R-Spondin Family Proteins, the Member of Canonical Wnt/β-Catenin Signaling Pathway
Source: Hindawi journal article supplement (doi:10.1155/2014/974316), 2014-01-01
Supplement: f1 [file 974316.f1.pdf]

**Supplementary Table 1****Table S1 Functional proteins associated R-spondin (Homo sapiens) and their protein IDs analyzed in this study.**

| <b>Seq No.</b> | <b>Protein</b> | <b>Protein/ Gene ID</b> | <b>Protein length</b> | <b>Other Information</b>                                                                                                                             |
|----------------|----------------|-------------------------|-----------------------|------------------------------------------------------------------------------------------------------------------------------------------------------|
| 1              | R-spondin-1    | NP_001033722.1          | 263 aa                | DEFINITION: R-spondin-1 isoform 1 precursor [Homo sapiens].<br><br>ACCESSION: NP_001033722<br><br>VERSION: NP_001033722.1<br>GI:84490388             |
| 2              | R-spondin-2    | NP_848660.3             | 243 aa                | DEFINITION: R-spondin-2 isoform 1 precursor [Homo sapiens].<br><br>ACCESSION: NP_848660<br><br>VERSION : NP_848660.3<br>GI:222446611                 |
| 3              | R-spondin-3    | NP_116173.2             | 272 aa                | DEFINITION R-spondin-3 precursor [Homo sapiens].<br><br>ACCESSION NP_116173<br><br>VERSION NP_116173.2<br>GI:18490982                                |
| 4              | R-spondin-4    | NP_001025042.2          | 234 aa                | DEFINITION R-spondin-4 isoform 1 precursor [Homo sapiens].<br><br>ACCESSION: NP_001025042<br>XP_297816<br><br>VERSION: NP_001025042.2<br>GI:83722284 |

## Supplementary Table 2

Table S2 (Rspo)s and their genes

| No | Gene/Locus   | Gene ID         | Gene Location                                    | Protein (Gene product) |
|----|--------------|-----------------|--------------------------------------------------|------------------------|
| 1  | <i>RSPO1</i> | Gene ID: 284654 | Chromosome: 1; 1p34.3<br>(38076821..38100595)    | R-spondin 1            |
| 2  | <i>RSPO2</i> | Gene ID: 340419 | Chromosome: 8; 8q23.1<br>(108911544..109095913 ) | R-spondin 2            |
| 3  | <i>RSPO3</i> | Gene ID: 84870  | Chromosome: 6; 6q22.33<br>(127439844..127520626) | R-spondin 3            |
| 4  | <i>RSPO4</i> | Gene ID: 343637 | Chromosome: 20;20p13<br>(939095..982907)         | R-spondin 4            |

**Supplementary Table S3- (Rspo)s and their compositional analysis, charge distribution analysis, repetitive structures, and cysteine positions**

| Name        | Mol. wt. (kdal) | Compositional analysis of amino acids                                                                                                                                                                                                                                                                       | Charge Distribution Analysis                                                                                                                                                                                                                                                                                                                                                                                             | Repetitive Structures                                                                                                                                                                                                                                                                                                                                                                                                       | cysteine positions                                                                              |
|-------------|-----------------|-------------------------------------------------------------------------------------------------------------------------------------------------------------------------------------------------------------------------------------------------------------------------------------------------------------|--------------------------------------------------------------------------------------------------------------------------------------------------------------------------------------------------------------------------------------------------------------------------------------------------------------------------------------------------------------------------------------------------------------------------|-----------------------------------------------------------------------------------------------------------------------------------------------------------------------------------------------------------------------------------------------------------------------------------------------------------------------------------------------------------------------------------------------------------------------------|-------------------------------------------------------------------------------------------------|
| R-spondin-1 | 29.0 kdal       | <p>A : 19(7.2%); C++: 23(8.7%); D- : 5(1.9%); E : 18(6.8%); F : 5(1.9%)</p> <p>G : 26(9.9%); H : 6(2.3%); I : 7(2.7%); K : 19(7.2%); L : 17(6.5%)</p> <p>M : 4(1.5%); N : 9(3.4%); P : 15(5.7%); Q : 15(5.7%); R+ : 27(10.3%)</p> <p>S : 21(8.0%); T : 10(3.8%); V : 11(4.2%); W : 3(1.1%); Y : 3(1.1%)</p> | <p>0+00000000<br/>0000000000<br/>0+00+0++0+ +000-<br/>00000 0+00-000-0<br/>0000+000+0</p> <p>0000-+0-0+<br/>0000000000 0000-<br/>0+00- 00+00+0+0-<br/>00-0000000 00+0+-<br/>0000</p> <p>0+0+000000 -<br/>000000000 -<br/>00000000-0 0-<br/>000000000<br/>++000000++ 00--<br/>+0++00</p> <p>00000-0000 0-0+-<br/>0++00 0++0000-00<br/>++++0000++ -<br/>000+000++ -0+-<br/>00000+</p> <p>+++0000000<br/>0000000000 000</p> | <p>A. SEPARATED, TANDEM, AND PERIODIC REPEATS: amino acid alphabet.</p> <p>Repeat core block length: 4</p> <p>Aligned matching blocks:</p> <p>[ 129- 132] CPEG<br/>[ 206- 209] CPEG<br/>[ 212- 215] RRKG<br/>[ 241- 244] RRKG</p> <p>B. SEPARATED AND TANDEM REPEATS: 11-letter reduced alphabet.</p> <p>(i= LVIF; += KR; -= ED; s= AG; o= ST; n= NQ; a= YW; p= P; h= H; m= M; c= C)</p> <p>Repeat core block length: 8</p> | <p>6, 40, 44, 47, 53, 56, 79, 94, 97, 102, 105, 111, 125, 129, 142, 148, 159, 166, 190, 199</p> |

|             |                      |                                                                                                                                                                                                                                                                                                                        |                                                                                                                                                                                                                                                                                                                                                                                                                         |                                                                                                                                                                                                                                                                                                                                                                                           |                                                                                                     |
|-------------|----------------------|------------------------------------------------------------------------------------------------------------------------------------------------------------------------------------------------------------------------------------------------------------------------------------------------------------------------|-------------------------------------------------------------------------------------------------------------------------------------------------------------------------------------------------------------------------------------------------------------------------------------------------------------------------------------------------------------------------------------------------------------------------|-------------------------------------------------------------------------------------------------------------------------------------------------------------------------------------------------------------------------------------------------------------------------------------------------------------------------------------------------------------------------------------------|-----------------------------------------------------------------------------------------------------|
| R-spondin-2 | 28<br>.3<br>kd<br>al | A : 10(4.1%); C++: 24( 9.9%); D : 9( 3.7%); E : 15( 6.2%); F : 13( 5.3%)<br><br>G : 17( 7.0%); H : 7( 2.9%); I : 8( 3.3%); K : 21( 8.6%); L- : 13( 5.3%)<br><br>M : 7( 2.9%); N : 10( 4.1%); P : 9( 3.7%); Q : 9( 3.7%); R+ : 27(11.1%)<br><br>S : 16( 6.6%); T : 11( 4.5%); V- : 7( 2.9%); W : 4( 1.6%); Y : 6( 2.5%) | 000+000000<br>000000-000<br>0000+0++0+<br>+000000000<br>+000000+-0<br>000+000+00<br><br>000+-00+0 00-<br>0000000 00000+00-<br>0 0+00+0+0-0 0-<br>0000+-00<br>0+0+000000<br><br>+0+00--00- 00000-<br>-00- 00-00-0000<br>0-00000+00<br>+0000+000-<br>0+0+000++0<br><br>0+-0000000 0-<br>0++0+000<br>+00000++00 +0+-<br>++0+++ +++00-+00-<br>00000000-+<br><br>000                                                         | A. SEPARATED,<br>TANDEM, AND PERIODIC<br>REPEATS: amino acid<br>alphabet.<br><br>Repeat core block<br>length: 4<br><br>B. SEPARATED AND<br>TANDEM REPEATS: 11-<br>letter reduced<br>alphabet.<br><br>(i= LVIF; += KR;<br>-= ED; s= AG; o= ST;<br>n= NQ; a= YW; p= P;<br>h= H; m= M; c= C)<br><br>Repeat core block<br>length: 8                                                           | 15, 21, 46, 52, 55, 74, 78, 93, 96, 101, 104, 110, 113, 124, 128, 141, 145, 156, 163, 187, 196, 203 |
| R-spondin-3 | 30<br>.9<br>kd<br>al | A- : 7( 2.6%); C++: 22( 8.1%); D : 7( 2.6%); E : 18( 6.6%); F : 8( 2.9%)<br><br>G : 21( 7.7%); H : 7( 2.6%); I : 12( 4.4%); K+ : 33(12.1%); L- : 14( 5.1%)<br><br>M : 5( 1.8%); N : 15( 5.5%); P : 13( 4.8%); Q : 14( 5.1%); R : 20( 7.4%)<br><br>S : 22( 8.1%); T : 14( 5.1%); V                                      | 000+000000<br>000000-000<br>00000+0++0<br>++00000000<br>0000000+00 -<br>00+00+0+0 -0-<br>0000+00<br>00+0+00000<br><br>00000-+000<br>+000000000<br>0000000+00 -<br>00+00+0+0 -0-<br>0000+00<br>00+0+00000<br><br>000+00-000 -00-<br>000000 -0000000-0<br>0-00000000<br>++0+0000++ 00-<br>0+0+-00<br><br>00000+0000 0000-<br>0++00 00+++00+0-<br>+0++0+----<br>++00+0-0+- 000-<br>0+00-0<br><br>0+-00-0+-0<br>+000+++00 - | A. SEPARATED, TANDEM, AND<br>PERIODIC REPEATS: amino acid<br>alphabet.<br><br>Repeat core block length: 4<br><br>Aligned matching blocks:<br>[ 93- 99] NK__CTKCK<br>[ 107- 115] NKNFCTKCK<br><br>B. SEPARATED AND TANDEM<br>REPEATS: 11-letter reduced<br>alphabet.<br><br>(i= LVIF; += KR; -= ED; s= AG; o= ST; n= NQ; a= YW; p= P; h= H; m= M; c= C)<br><br>Repeat core block length: 8 | 41, 45, 48, 54, 57, 76, 80, 95, 102, 105, 111, 114, 125, 129, 142, 148, 159, 166, 190, 199          |

|             |             |                                                                                                                                                                                                                                                                                                                                             |                                                                                                                                                                                                                                                                                                                                         |                                                                                                                                                                                                                                                                                                                                                                                                                         |                                                                                        |
|-------------|-------------|---------------------------------------------------------------------------------------------------------------------------------------------------------------------------------------------------------------------------------------------------------------------------------------------------------------------------------------------|-----------------------------------------------------------------------------------------------------------------------------------------------------------------------------------------------------------------------------------------------------------------------------------------------------------------------------------------|-------------------------------------------------------------------------------------------------------------------------------------------------------------------------------------------------------------------------------------------------------------------------------------------------------------------------------------------------------------------------------------------------------------------------|----------------------------------------------------------------------------------------|
|             |             | : 11 ( 4.0%);<br>W : 3 ( 1.1%); Y : 6 ( 2.2%)                                                                                                                                                                                                                                                                                               | +0+000000 00                                                                                                                                                                                                                                                                                                                            |                                                                                                                                                                                                                                                                                                                                                                                                                         |                                                                                        |
| R-spondin-4 | 26 .2 kd al | A : 11 ( 4.7%); C++: 23 ( 9.8%); D : 7 ( 3.0%); E : 14 ( 6.0%); F : 6 ( 2.6%)<br><br>G+ : 27 (11.5%); H : 5 ( 2.1%); I : 7 ( 3.0%); K : 15 ( 6.4%); L : 20 ( 8.5%)<br><br>M : 2 ( 0.9%); N : 6 ( 2.6%); P : 16 ( 6.8%); Q : 14 ( 6.0%); R++: 27 (11.5%)<br><br>S : 10 ( 4.3%); T : 10 ( 4.3%); V- : 7 ( 3.0%); W : 3 ( 1.3%); Y : 4 ( 1.7%) | 0+00000000 00000-<br>0000 0++++00000<br>0000000000 00--<br>000000 00+00000++<br><br>-00+000+00 0-<br>00000000 +00-<br>00+0++ 00000-0000<br>0-000+0++0<br>0000+0+000<br><br>0000000000 00+-<br>000-0- 0000000000<br>0000+00000 000-<br>0+0+-0 0+000--000<br><br>00000-0++0<br>000+0000-+<br>0000++0++- ++0++-<br>++0- ++0-0+0+00<br>0000 | A. SEPARATED, TANDEM, AND PERIODIC REPEATS: amino acid alphabet.<br><br>Repeat core block length: 4<br><br>Aligned matching blocks:<br>[ 67- 76] GKCLHDCPPG<br>[ 116- 125] GKCLPTCPPG<br>[ 208- 211] RKDR<br>[ 214- 217] RKDR<br><br>B. SEPARATED AND TANDEM REPEATS: 11-letter reduced alphabet.<br><br>(i= LVIF; += KR; -= ED; s= AG; o= ST; n= NQ; a= YW; p= P; h= H; m= M; c= C)<br><br>Repeat core block length: 8 | 6, 35, 38, 41, 47, 50, 73, 88, 91, 95, 98, 104, 118, 122, 135, 139, 150, 157, 181, 190 |

**Supplementary Table 4**

**Table S4- Phosphorylation sites of (Rspo)s**

**R-respondin-1**

Phosphorylation sites predicted: Ser: 7 Thr: 4 Tyr: 2

| Serine predictions |     |           |       |      |
|--------------------|-----|-----------|-------|------|
| Name               | Pos | Context   | Score | Pred |
| R_spondin_1        | 13  | ALVLSWHTL | 0.031 | .    |
| R_spondin_1        | 20  | HLTISSRGI | 0.925 | *S*  |
| R_spondin_1        | 21  | LTISSRGIK | 0.003 | .    |
| R_spondin_1        | 33  | QRRISAEGS | 0.998 | *S*  |
| R_spondin_1        | 37  | SAEGSQACA | 0.517 | *S*  |
| R_spondin_1        | 48  | CELCEVNG  | 0.047 | .    |
| R_spondin_1        | 57  | CLKCSFKLF | 0.277 | .    |
| R_spondin_1        | 78  | VCLFSCPFG | 0.010 | .    |
| R_spondin_1        | 107 | EACFSHNFC | 0.003 | .    |
| R_spondin_1        | 133 | CPEGSSAAN | 0.009 | .    |
| R_spondin_1        | 134 | PEGSSAANG | 0.029 | .    |
| R_spondin_1        | 143 | TMECSSPAQ | 0.010 | .    |
| R_spondin_1        | 144 | MECSSPAQC | 0.494 | .    |
| R_spondin_1        | 151 | QCEMSEWSF | 0.023 | .    |
| R_spondin_1        | 154 | MSEWSWPGP | 0.313 | .    |
| R_spondin_1        | 160 | WGFCSKQKQ | 0.537 | *S*  |
| R_spondin_1        | 172 | FRGSEERT  | 0.998 | *S*  |
| R_spondin_1        | 191 | HAACSDTKE | 0.143 | .    |
| R_spondin_1        | 232 | ARKESKEAG | 0.993 | *S*  |
| R_spondin_1        | 239 | AGAGSRRRK | 0.794 | *S*  |
| R_spondin_1        | 259 | GPLTSAGFA | 0.013 | .    |

  

| Threonine predictions |     |           |       |      |
|-----------------------|-----|-----------|-------|------|
| Name                  | Pos | Context   | Score | Pred |
| R_spondin_1           | 15  | VLSWHLFI  | 0.004 | .    |
| R_spondin_1           | 18  | WHLTISSR  | 0.507 | *T*  |
| R_spondin_1           | 112 | HNFTCKCKE | 0.499 | .    |
| R_spondin_1           | 139 | AANGTMECS | 0.023 | .    |
| R_spondin_1           | 176 | SEERTRVVL | 0.926 | *T*  |
| R_spondin_1           | 193 | ACSDIKETR | 0.047 | .    |
| R_spondin_1           | 196 | DIKETRRCT | 0.858 | *T*  |
| R_spondin_1           | 200 | TRRCTVRRV | 0.990 | *T*  |
| R_spondin_1           | 253 | QQQTIVGEL | 0.128 | .    |
| R_spondin_1           | 258 | VGPLTSAGF | 0.421 | .    |

  

| Tyrosine predictions |     |           |       |      |
|----------------------|-----|-----------|-------|------|
| Name                 | Pos | Context   | Score | Pred |
| R_spondin_1          | 83  | CPFGYFDAR | 0.897 | *Y*  |
| R_spondin_1          | 119 | KEGLYLHRG | 0.923 | *Y*  |
| R_spondin_1          | 126 | KGRCYPACF | 0.019 | .    |

**R-respondin-3**

Phosphorylation sites predicted: Ser: 8 Thr: 5 Tyr: 1

| Serine predictions |     |           |       |      |
|--------------------|-----|-----------|-------|------|
| Name               | Pos | Context   | Score | Pred |
| R_spondin_3        | 7   | LRLISWLFY | 0.022 | .    |
| R_spondin_3        | 21  | EYIGSNAS  | 0.011 | .    |
| R_spondin_3        | 25  | SQNASRGR  | 0.350 | .    |
| R_spondin_3        | 38  | MFNVSGGCG | 0.722 | *S*  |
| R_spondin_3        | 49  | CAICSDYNG | 0.056 | .    |
| R_spondin_3        | 56  | NGCLSKKFR | 0.147 | .    |
| R_spondin_3        | 78  | GVCLSKSFS | 0.034 | .    |
| R_spondin_3        | 79  | VCLSSCPFG | 0.019 | .    |
| R_spondin_3        | 82  | SSCFPSGYG | 0.120 | .    |
| R_spondin_3        | 116 | TKCRSGFYL | 0.010 | .    |
| R_spondin_3        | 144 | MECVSDFG  | 0.052 | .    |
| R_spondin_3        | 151 | HCEVSEWNP | 0.007 | .    |
| R_spondin_3        | 157 | WNFWSPCTK | 0.042 | .    |
| R_spondin_3        | 184 | IQHPSAKGN | 0.785 | *S*  |
| R_spondin_3        | 228 | NKGSKEAL  | 0.994 | *S*  |
| R_spondin_3        | 235 | ALPDKSLE  | 0.238 | .    |
| R_spondin_3        | 237 | PDSKSLESS | 0.995 | *S*  |
| R_spondin_3        | 240 | KSLESSKEI | 0.997 | *S*  |
| R_spondin_3        | 241 | SLESSKEIP | 0.978 | *S*  |
| R_spondin_3        | 265 | DKQKSVSVS | 0.912 | *S*  |
| R_spondin_3        | 267 | QKSVSVSTV | 0.833 | *S*  |
| R_spondin_3        | 269 | SVSVSTVH- | 0.437 | .    |

  

| Threonine predictions |     |            |       |      |
|-----------------------|-----|------------|-------|------|
| Name                  | Pos | Context    | Score | Pred |
| R_spondin_3           | 47  | GGCAICSDY  | 0.122 | .    |
| R_spondin_3           | 87  | GYGTRYPD   | 0.545 | *T*  |
| R_spondin_3           | 96  | INKCTCKKA  | 0.286 | .    |
| R_spondin_3           | 104 | ADCDIGFHK  | 0.038 | .    |
| R_spondin_3           | 112 | KNFCTCKKS  | 0.204 | .    |
| R_spondin_3           | 139 | ANNHIMECV  | 0.006 | .    |
| R_spondin_3           | 160 | WSPCTKSKG  | 0.822 | *T*  |
| R_spondin_3           | 165 | KKKCTGGK   | 0.017 | .    |
| R_spondin_3           | 172 | FKRGITETRV | 0.727 | *T*  |
| R_spondin_3           | 174 | RGITETRVRE | 0.844 | *T*  |
| R_spondin_3           | 193 | LCFPFINEIR | 0.008 | .    |
| R_spondin_3           | 196 | PTNEIRKCI  | 0.705 | *T*  |
| R_spondin_3           | 200 | TRKCTVQRK  | 0.107 | .    |
| R_spondin_3           | 270 | SVSVSTVH-- | 0.110 | .    |

  

| Tyrosine predictions |     |           |       |      |
|----------------------|-----|-----------|-------|------|
| Name                 | Pos | Context   | Score | Pred |
| R_spondin_3          | 18  | NFMEYIGSQ | 0.064 | .    |
| R_spondin_3          | 51  | ICSDYNGCL | 0.108 | .    |
| R_spondin_3          | 84  | CFSGYGYGR | 0.131 | .    |
| R_spondin_3          | 85  | PSGYGYGR  | 0.199 | .    |
| R_spondin_3          | 89  | YGRVYFDIN | 0.883 | *Y*  |
| R_spondin_3          | 119 | KSGFYLHLG | 0.228 | .    |

**R-respondin-2**

Phosphorylation sites predicted: Ser: 4 Thr: 1 Tyr: 1

| Serine predictions |     |            |       |      |
|--------------------|-----|------------|-------|------|
| Name               | Pos | Context    | Score | Pred |
| R_spondin_2        | 7   | FRLFSFALI  | 0.005 | .    |
| R_spondin_2        | 19  | CMDVSHCQG  | 0.005 | .    |
| R_spondin_2        | 29  | RWRRSKRAS  | 0.988 | *S*  |
| R_spondin_2        | 33  | SKRASVYVSN | 0.997 | *S*  |
| R_spondin_2        | 36  | ASYVSNPIC  | 0.015 | .    |
| R_spondin_2        | 45  | KGCLSKSND  | 0.006 | .    |
| R_spondin_2        | 47  | CLCSKDNQ   | 0.093 | .    |
| R_spondin_2        | 53  | DNGCSRCCQ  | 0.152 | .    |
| R_spondin_2        | 77  | ECLHSCPSG  | 0.064 | .    |
| R_spondin_2        | 80  | HSCPSGYYG  | 0.047 | .    |
| R_spondin_2        | 103 | ENCDCSFSK  | 0.040 | .    |
| R_spondin_2        | 106 | DSCFSKDFC  | 0.007 | .    |
| R_spondin_2        | 151 | VGHNSEWGT  | 0.030 | .    |
| R_spondin_2        | 157 | WGTCRRNRR  | 0.003 | .    |
| R_spondin_2        | 193 | TIAESRRCK  | 0.788 | *S*  |
| R_spondin_2        | 233 | QEQHSVFLA  | 0.555 | *S*  |

  

| Threonine predictions |     |            |       |      |
|-----------------------|-----|------------|-------|------|
| Name                  | Pos | Context    | Score | Pred |
| R_spondin_2           | 111 | KDFCTKCKV  | 0.344 | .    |
| R_spondin_2           | 138 | PLEETMECV  | 0.171 | .    |
| R_spondin_2           | 155 | SEWGTCSRNR | 0.106 | .    |
| R_spondin_2           | 162 | RNNRTCQFK  | 0.007 | .    |
| R_spondin_2           | 171 | WGLETIRIQ  | 0.076 | .    |
| R_spondin_2           | 173 | LETETRIQIV | 0.020 | .    |
| R_spondin_2           | 184 | PVKDTILCP  | 0.097 | .    |
| R_spondin_2           | 189 | ILCPTIAES  | 0.098 | .    |
| R_spondin_2           | 199 | RCKMTMRHC  | 0.398 | .    |
| R_spondin_2           | 209 | GKRTFKPAK  | 0.880 | *T*  |
| R_spondin_2           | 238 | VFLATDRAN  | 0.213 | .    |

  

| Tyrosine predictions |     |            |       |      |
|----------------------|-----|------------|-------|------|
| Name                 | Pos | Context    | Score | Pred |
| R_spondin_2          | 18  | NCMDVSHCQ  | 0.095 | .    |
| R_spondin_2          | 34  | KRASVYVSNP | 0.941 | *Y*  |
| R_spondin_2          | 71  | GMRQYGECL  | 0.041 | .    |
| R_spondin_2          | 82  | CPSGYGYGHR | 0.129 | .    |
| R_spondin_2          | 83  | PSGYGYGHR  | 0.190 | .    |
| R_spondin_2          | 118 | KVGFYLHRG  | 0.031 | .    |

**R-respondin-4**

Phosphorylation sites predicted: Ser: 2 Thr: 0 Tyr: 0

| Serine predictions |     |           |       |      |
|--------------------|-----|-----------|-------|------|
| Name               | Pos | Context   | Score | Pred |
| R_spondin_4        | 42  | CIICSENG  | 0.190 | .    |
| R_spondin_4        | 48  | ENGCSCTCQ | 0.088 | .    |
| R_spondin_4        | 97  | ATCESCFQS | 0.041 | .    |
| R_spondin_4        | 100 | ESCFSQDFC | 0.007 | .    |
| R_spondin_4        | 148 | WGWSPCTH  | 0.013 | .    |
| R_spondin_4        | 159 | KTCGSANGL | 0.021 | .    |
| R_spondin_4        | 165 | WLESVRRE  | 0.091 | .    |
| R_spondin_4        | 185 | CQVLESERK | 0.851 | *S*  |
| R_spondin_4        | 187 | VLESERKCP | 0.945 | *S*  |
| R_spondin_4        | 201 | FGERSFGQK | 0.403 | .    |

  

| Threonine predictions |     |           |       |      |
|-----------------------|-----|-----------|-------|------|
| Name                  | Pos | Context   | Score | Pred |
| R_spondin_4           | 29  | KQVIGLGG  | 0.039 | .    |
| R_spondin_4           | 36  | GGNCTGCII | 0.013 | .    |
| R_spondin_4           | 49  | NGCSTCQQR | 0.032 | .    |
| R_spondin_4           | 94  | KCGATCESC | 0.021 | .    |
| R_spondin_4           | 121 | KCLFPCFP  | 0.013 | .    |
| R_spondin_4           | 126 | CFPGTLAHQ | 0.040 | .    |
| R_spondin_4           | 132 | AHQNTRECQ | 0.026 | .    |
| R_spondin_4           | 151 | WSPCTHNSK | 0.117 | .    |
| R_spondin_4           | 186 | HNGKTCGSA | 0.076 | .    |
| R_spondin_4           | 180 | EERATCQVL | 0.093 | .    |

  

| Tyrosine predictions |     |           |       |      |
|----------------------|-----|-----------|-------|------|
| Name                 | Pos | Context   | Score | Pred |
| R_spondin_4          | 66  | GIRQYGRCL | 0.007 | .    |
| R_spondin_4          | 77  | CFPGYFGIR | 0.457 | .    |
| R_spondin_4          | 112 | KQFYLYKGC | 0.096 | .    |
| R_spondin_4          | 114 | QFYLYKGC  | 0.026 | .    |

Supplementary Table 5

Table S5- N-glycosylation sites of (Rspo)s

| R-spondin-1<br>(Threshold=0.5) |          |           |                |               | R-spondin-3<br>(Threshold=0.5) |          |           |                |               |
|--------------------------------|----------|-----------|----------------|---------------|--------------------------------|----------|-----------|----------------|---------------|
| SeqName                        | Position | Potential | Jury agreement | N-Glyc result | SeqName                        | Position | Potential | Jury agreement | N-Glyc result |
| R-spondin-1                    | 137 NGTM | 0.6591    | (8/9)          | +             | R-spondin-3                    | 23 NASR  | 0.5513    | (5/9)          | +             |
|                                |          |           |                |               | R-spondin-3                    | 36 NVSQ  | 0.7283    | (9/9)          | ++            |
|                                |          |           |                |               | R-spondin-3                    | 137 NHTM | 0.5899    | (6/9)          | +             |
|                                |          |           |                |               | R-spondin-3                    | 194 NETR | 0.5246    | (7/9)          | +             |
| R-spondin-2<br>(Threshold=0.5) |          |           |                |               | R-spondin-4<br>(Threshold=0.5) |          |           |                |               |
| SeqName                        | Position | Potential | Jury agreement | N-Glyc result | SeqName                        | Position | Potential | Jury agreement | N-Glyc result |
| R-spondin-2                    | 160 NRTC | 0.6008    | (6/9)          | +             | R-spondin-4                    | 34 NCTG  | 0.6842    | (9/9)          | ++            |



Supplementary Table 6

Table S6- O-glycosylation sites of (Rspo)s

| R-spondin-1 |     |     |         |         |     |         | R-spondin-3 |     |     |         |         |     |         |
|-------------|-----|-----|---------|---------|-----|---------|-------------|-----|-----|---------|---------|-----|---------|
| Name        | S/T | Pos | G-score | I-score | Y/N | Comment | Name        | S/T | Pos | G-score | I-score | Y/N | Comment |
| R_spondin_1 | S   | 13  | 0.123   | 0.044   | .   | -       | R_spondin_3 | S   | 7   | 0.113   | 0.054   | .   | -       |
| R_spondin_1 | T   | 15  | 0.173   | 0.052   | .   | -       | R_spondin_3 | S   | 21  | 0.110   | 0.054   | .   | -       |
| R_spondin_1 | T   | 18  | 0.208   | 0.055   | .   | -       | R_spondin_3 | S   | 25  | 0.151   | 0.042   | .   | -       |
| R_spondin_1 | S   | 20  | 0.168   | 0.055   | .   | -       | R_spondin_3 | S   | 38  | 0.197   | 0.116   | .   | -       |
| R_spondin_1 | S   | 21  | 0.190   | 0.078   | .   | -       | R_spondin_3 | T   | 47  | 0.238   | 0.030   | .   | -       |
| R_spondin_1 | S   | 33  | 0.241   | 0.053   | .   | -       | R_spondin_3 | S   | 49  | 0.166   | 0.034   | .   | -       |
| R_spondin_1 | S   | 37  | 0.190   | 0.038   | .   | -       | R_spondin_3 | S   | 56  | 0.105   | 0.056   | .   | -       |
| R_spondin_1 | S   | 48  | 0.159   | 0.062   | .   | -       | R_spondin_3 | S   | 78  | 0.161   | 0.103   | .   | -       |
| R_spondin_1 | S   | 57  | 0.093   | 0.067   | .   | -       | R_spondin_3 | S   | 79  | 0.158   | 0.034   | .   | -       |
| R_spondin_1 | S   | 78  | 0.178   | 0.253   | .   | -       | R_spondin_3 | S   | 82  | 0.164   | 0.034   | .   | -       |
| R_spondin_1 | S   | 107 | 0.076   | 0.057   | .   | -       | R_spondin_3 | T   | 87  | 0.240   | 0.057   | .   | -       |
| R_spondin_1 | T   | 112 | 0.150   | 0.052   | .   | -       | R_spondin_3 | T   | 96  | 0.208   | 0.030   | .   | -       |
| R_spondin_1 | S   | 133 | 0.296   | 0.057   | .   | -       | R_spondin_3 | T   | 104 | 0.170   | 0.020   | .   | -       |
| R_spondin_1 | S   | 134 | 0.316   | 0.133   | .   | -       | R_spondin_3 | T   | 112 | 0.116   | 0.051   | .   | -       |
| R_spondin_1 | T   | 139 | 0.509   | 0.059   | T   | -       | R_spondin_3 | S   | 116 | 0.082   | 0.032   | .   | -       |
| R_spondin_1 | S   | 143 | 0.465   | 0.039   | .   | -       | R_spondin_3 | T   | 139 | 0.206   | 0.045   | .   | -       |
| R_spondin_1 | S   | 144 | 0.425   | 0.026   | .   | -       | R_spondin_3 | S   | 144 | 0.225   | 0.036   | .   | -       |
| R_spondin_1 | S   | 151 | 0.296   | 0.048   | .   | -       | R_spondin_3 | S   | 151 | 0.198   | 0.034   | .   | -       |
| R_spondin_1 | S   | 154 | 0.277   | 0.035   | .   | -       | R_spondin_3 | S   | 157 | 0.241   | 0.050   | .   | -       |
| R_spondin_1 | S   | 160 | 0.243   | 0.032   | .   | -       | R_spondin_3 | T   | 160 | 0.363   | 0.048   | .   | -       |
| R_spondin_1 | S   | 172 | 0.221   | 0.026   | .   | -       | R_spondin_3 | T   | 165 | 0.391   | 0.055   | .   | -       |
| R_spondin_1 | T   | 176 | 0.270   | 0.058   | .   | -       | R_spondin_3 | T   | 172 | 0.378   | 0.034   | .   | -       |
| R_spondin_1 | S   | 191 | 0.298   | 0.042   | .   | -       | R_spondin_3 | T   | 174 | 0.288   | 0.032   | .   | -       |
| R_spondin_1 | T   | 193 | 0.443   | 0.044   | .   | -       | R_spondin_3 | S   | 184 | 0.276   | 0.154   | .   | -       |
| R_spondin_1 | T   | 196 | 0.438   | 0.076   | .   | -       | R_spondin_3 | T   | 193 | 0.342   | 0.066   | .   | -       |
| R_spondin_1 | T   | 200 | 0.365   | 0.031   | .   | -       | R_spondin_3 | T   | 196 | 0.341   | 0.073   | .   | -       |
| R_spondin_1 | S   | 232 | 0.199   | 0.043   | .   | -       | R_spondin_3 | T   | 200 | 0.278   | 0.025   | .   | -       |
| R_spondin_1 | S   | 239 | 0.230   | 0.030   | .   | -       | R_spondin_3 | S   | 228 | 0.298   | 0.044   | .   | -       |
| R_spondin_1 | T   | 253 | 0.491   | 0.288   | .   | -       | R_spondin_3 | S   | 235 | 0.345   | 0.060   | .   | -       |
| R_spondin_1 | T   | 258 | 0.551   | 0.078   | T   | -       | R_spondin_3 | S   | 237 | 0.344   | 0.021   | .   | -       |
| R_spondin_1 | S   | 259 | 0.484   | 0.383   | .   | -       | R_spondin_3 | S   | 240 | 0.302   | 0.043   | .   | -       |
|             |     |     |         |         |     |         | R_spondin_3 | S   | 241 | 0.309   | 0.058   | .   | -       |
|             |     |     |         |         |     |         | R_spondin_3 | S   | 265 | 0.291   | 0.062   | .   | -       |
|             |     |     |         |         |     |         | R_spondin_3 | S   | 267 | 0.343   | 0.058   | .   | -       |
|             |     |     |         |         |     |         | R_spondin_3 | S   | 269 | 0.370   | 0.085   | .   | -       |
|             |     |     |         |         |     |         | R_spondin_3 | T   | 270 | 0.478   | 0.029   | .   | -       |

  

| R-spondin-2 |     |     |         |         |     |         | R-spondin-4 |     |     |         |         |     |         |
|-------------|-----|-----|---------|---------|-----|---------|-------------|-----|-----|---------|---------|-----|---------|
| Name        | S/T | Pos | G-score | I-score | Y/N | Comment | Name        | S/T | Pos | G-score | I-score | Y/N | Comment |
| R_spondin_2 | S   | 7   | 0.115   | 0.054   | .   | -       | R_spondin_4 | T   | 29  | 0.198   | 0.101   | .   | -       |
| R_spondin_2 | S   | 19  | 0.092   | 0.041   | .   | -       | R_spondin_4 | T   | 36  | 0.221   | 0.037   | .   | -       |
| R_spondin_2 | S   | 29  | 0.142   | 0.031   | .   | -       | R_spondin_4 | S   | 42  | 0.142   | 0.073   | .   | -       |
| R_spondin_2 | S   | 33  | 0.168   | 0.034   | .   | -       | R_spondin_4 | S   | 48  | 0.108   | 0.023   | .   | -       |
| R_spondin_2 | S   | 36  | 0.155   | 0.080   | .   | -       | R_spondin_4 | T   | 49  | 0.159   | 0.028   | .   | -       |
| R_spondin_2 | S   | 45  | 0.136   | 0.053   | .   | -       | R_spondin_4 | T   | 94  | 0.175   | 0.023   | .   | -       |
| R_spondin_2 | S   | 47  | 0.139   | 0.059   | .   | -       | R_spondin_4 | S   | 97  | 0.107   | 0.021   | .   | -       |
| R_spondin_2 | S   | 53  | 0.102   | 0.029   | .   | -       | R_spondin_4 | S   | 100 | 0.089   | 0.055   | .   | -       |
| R_spondin_2 | S   | 77  | 0.153   | 0.053   | .   | -       | R_spondin_4 | T   | 121 | 0.227   | 0.456   | .   | -       |
| R_spondin_2 | S   | 80  | 0.164   | 0.037   | .   | -       | R_spondin_4 | T   | 126 | 0.288   | 0.057   | .   | -       |
| R_spondin_2 | S   | 103 | 0.114   | 0.021   | .   | -       | R_spondin_4 | T   | 132 | 0.389   | 0.055   | .   | -       |
| R_spondin_2 | S   | 106 | 0.092   | 0.061   | .   | -       | R_spondin_4 | S   | 148 | 0.236   | 0.036   | .   | -       |
| R_spondin_2 | T   | 111 | 0.139   | 0.053   | .   | -       | R_spondin_4 | T   | 151 | 0.334   | 0.051   | .   | -       |
| R_spondin_2 | T   | 138 | 0.310   | 0.042   | .   | -       | R_spondin_4 | T   | 156 | 0.377   | 0.031   | .   | -       |
| R_spondin_2 | S   | 151 | 0.179   | 0.033   | .   | -       | R_spondin_4 | S   | 159 | 0.260   | 0.026   | .   | -       |
| R_spondin_2 | T   | 155 | 0.234   | 0.043   | .   | -       | R_spondin_4 | S   | 165 | 0.297   | 0.032   | .   | -       |
| R_spondin_2 | S   | 157 | 0.168   | 0.032   | .   | -       | R_spondin_4 | T   | 180 | 0.427   | 0.088   | .   | -       |
| R_spondin_2 | T   | 162 | 0.268   | 0.035   | .   | -       | R_spondin_4 | S   | 185 | 0.325   | 0.068   | .   | -       |
| R_spondin_2 | T   | 171 | 0.249   | 0.033   | .   | -       | R_spondin_4 | S   | 187 | 0.374   | 0.059   | .   | -       |
| R_spondin_2 | T   | 173 | 0.246   | 0.063   | .   | -       | R_spondin_4 | S   | 201 | 0.326   | 0.031   | .   | -       |
| R_spondin_2 | T   | 184 | 0.328   | 0.062   | .   | -       |             |     |     |         |         |     |         |
| R_spondin_2 | T   | 189 | 0.304   | 0.178   | .   | -       |             |     |     |         |         |     |         |
| R_spondin_2 | S   | 193 | 0.190   | 0.055   | .   | -       |             |     |     |         |         |     |         |
| R_spondin_2 | T   | 199 | 0.377   | 0.055   | .   | -       |             |     |     |         |         |     |         |
| R_spondin_2 | T   | 209 | 0.241   | 0.042   | .   | -       |             |     |     |         |         |     |         |
| R_spondin_2 | S   | 233 | 0.167   | 0.037   | .   | -       |             |     |     |         |         |     |         |
| R_spondin_2 | T   | 238 | 0.382   | 0.065   | .   | -       |             |     |     |         |         |     |         |
